# Inhibitor of DNA Binding 3 Limits Development of Murine Slam-Associated Adaptor Protein-Dependent “Innate” $\gamma\delta$ T cells

Mihalis Verykokakis<sup>1,2</sup>, Markus D. Boos<sup>2</sup>, Albert Bendelac<sup>1,2,3</sup>, Erin J. Adams<sup>2,4</sup>, Pablo Pereira<sup>5</sup>, Barbara L. Kee<sup>1,2\*</sup>

**1** Department of Pathology, University of Chicago, Chicago, Illinois, United States of America, **2** Committee on Immunology, University of Chicago, Chicago, Illinois, United States of America, **3** Howard Hughes Medical Institute, University of Chicago, Chicago, Illinois, United States of America, **4** Department of Biochemistry, University of Chicago, Chicago, Illinois, United States of America, **5** Unité du Développement des Lymphocytes, Institute Pasteur and Institut National de la Santé et de la Recherche Médicale INSERM U668, Paris, France

## Abstract

**Background:** *Id3* is a dominant antagonist of E protein transcription factor activity that is induced by signals emanating from the  $\alpha\beta$  and  $\gamma\delta$  T cell receptor (TCR). Mice lacking *Id3* were previously shown to have subtle defects in positive and negative selection of TCR $\alpha\beta$ <sup>+</sup> T lymphocytes. More recently, *Id3*<sup>-/-</sup> mice on a C57BL/6 background were shown to have a dramatic expansion of  $\gamma\delta$  T cells.

**Methodology/Principal Findings:** Here we report that mice lacking *Id3* have reduced thymocyte numbers but increased production of  $\gamma\delta$  T cells that express a V $\gamma$ 1.1<sup>+</sup>V $\delta$ 6.3<sup>+</sup> receptor with restricted junctional diversity. These V $\gamma$ 1.1<sup>+</sup>V $\delta$ 6.3<sup>+</sup> T cells have multiple characteristics associated with “innate” lymphocytes such as natural killer T (NKT) cells including an activated phenotype, expression of the transcription factor PLZF, and rapid production of IFN $\gamma$  and interleukin-4. Moreover, like other “innate” lymphocyte populations, development of *Id3*<sup>-/-</sup> V $\gamma$ 1.1<sup>+</sup>V $\delta$ 6.3<sup>+</sup> T cells requires the signaling adapter protein SAP.

**Conclusions:** Our data provide novel insight into the requirements for development of V $\gamma$ 1.1<sup>+</sup>V $\delta$ 6.3<sup>+</sup> T cells and indicate a role for *Id3* in repressing the response of “innate”  $\gamma\delta$  T cells to SAP-mediated expansion or survival.

**Citation:** Verykokakis M, Boos MD, Bendelac A, Adams EJ, Pereira P, et al. (2010) Inhibitor of DNA Binding 3 Limits Development of Murine Slam-Associated Adaptor Protein-Dependent “Innate”  $\gamma\delta$  T cells. PLoS ONE 5(2): e9303. doi:10.1371/journal.pone.0009303

**Editor:** Derya Unutmaz, New York University, United States of America

**Received:** December 28, 2009; **Accepted:** January 27, 2010; **Published:** February 19, 2010

**Copyright:** © 2010 Verykokakis et al. This is an open-access article distributed under the terms of the Creative Commons Attribution License, which permits unrestricted use, distribution, and reproduction in any medium, provided the original author and source are credited.

**Funding:** This work was funded by the National Institutes of Health (R01 CA099978, R01 AI073922 and T32 GM07281) and a Leukemia and Lymphoma Society Scholar Award ([http://www.lls.org/hm\\_lls](http://www.lls.org/hm_lls)). The funders had no role in study design, data collection and analysis, decision to publish, or preparation of the manuscript.

**Competing Interests:** The authors have declared that no competing interests exist.

\* E-mail: bkee@bsd.uchicago.edu

## Introduction

T lymphocytes bearing  $\alpha\beta$  or  $\gamma\delta$  T cell receptors (TCR) develop in the thymus from a common progenitor cell pool. Most cells in the adult thymus express the co-receptor molecules CD4 and CD8 and represent an intermediate stage in  $\alpha\beta$  T cell development that has undergone productive TCR $\beta$  rearrangement and is in the process of TCR $\alpha$  rearrangement. After expression of a functional TCR $\alpha$  CD4<sup>+</sup>CD8<sup>+</sup> (double positive, DP) cells undergo negative or positive selection and become single positive (SP) cells [1]. In contrast, the earliest T cell progenitors, and  $\gamma\delta$  T cells, are CD4<sup>-</sup>CD8<sup>-</sup> (double negative, DN) and can be divided into four stages based on expression of CD117 (*c-kit*) and CD25; DN1, (*c-kit*<sup>+</sup>CD25<sup>-</sup>), DN2 (*c-kit*<sup>+</sup>CD25<sup>+</sup>), DN3 (*c-kit*-CD25<sup>+</sup>) and DN4 (*c-kit*-CD25<sup>-</sup>) [2]. DN1 and DN2 cells are the most immature T cell progenitors and are not yet fully committed to T cell differentiation [3,4]. Rearrangement of TCR loci initiates at the DN2 stage but is most prevalent in DN3 cells [5,6]. DN3 cells that rearrange and express TCR $\beta$  undergo  $\beta$ -chain selection and progress to the DN4 stage before becoming DP [7]. In contrast, cells that rearrange functional

*Tcr $\gamma$*  and *Tcr $\delta$*  genes diverge from the  $\alpha\beta$  pathway and become DN  $\gamma\delta$  T cells [2]. The stage at which the  $\alpha\beta$  and  $\gamma\delta$  T cell lineages diverge remains controversial [8,9,10,11,12].

During ontogeny, the variable gene segments of the *Tcr $\gamma$*  and *Tcr $\delta$*  genes are rearranged in ordered waves. The first wave occurs around embryonic day 13 and includes rearrangement of V $\gamma$ 3 and V $\delta$ 1 and is followed by rearrangement of V $\gamma$ 4 [13,14] (Nomenclature according to [15]). These receptors contain limited diversity at the junction of the V, diversity (D), and joining (J) segments [16,17] in part because terminal deoxynucleotidyl transferase (TdT), a polymerase that adds non-templated nucleotides, is absent from embryonic cells [18,19]. Consequently, the first  $\gamma\delta$  T cells express invariant V $\gamma$ 3/V $\delta$ 1 or V $\gamma$ 4/V $\delta$ 1 TCRs and home specifically to the epidermis or the epithelium of the reproductive tract and the tongue, respectively [20]. In contrast to the embryo, the adult thymus rearranges V $\gamma$ 1.1, V $\gamma$ 2 and V $\gamma$ 5 and generates receptors with extensive junctional diversity, creating a highly diverse  $\gamma\delta$  TCR repertoire [21]. Interestingly, a subset of  $\gamma\delta$  T cells with an invariant V $\gamma$ 1.1<sup>+</sup>V $\delta$ 6.3<sup>+</sup> TCR has been described that resides in the adult thymus, spleen, and liver [22]. These  $\gamma\delta$  T cells develop from

late embryonic precursors and expand during neonatal life [23]. V $\gamma$ 1.1<sup>+</sup>V $\delta$ 6.3<sup>+</sup> T cells share multiple characteristics with natural killer (NK) T cells including expression of the activation markers CD44, and NK1.1, and low expression of the immature T lymphocyte marker CD24. Moreover, both NKT and V $\gamma$ 1.1<sup>+</sup>V $\delta$ 6.3<sup>+</sup> T cells secrete IFN $\gamma$  and IL4 rapidly after stimulation *in vitro* [24]. These findings led to the hypothesis that NKT and V $\gamma$ 1.1<sup>+</sup>V $\delta$ 6.3<sup>+</sup> T cells represent innate branches of the  $\alpha\beta$  and  $\gamma\delta$  T cell lineages, respectively [25]. The presence of an invariant receptor on these two T cell subsets is consistent with the hypothesis that the functional characteristics of these “innate-like” cells are determined in part via selection by endogenous ligands.

T cell development is intimately linked to activity of the E protein transcription factors E2A and HEB [26,27,28]. E proteins are essential at multiple stages of  $\alpha\beta$  T cell development and function in lymphocyte survival, proliferation and differentiation. Importantly, induction of E protein antagonists such as Id2 and Id3 appears to be critical for  $\beta$ -selection and positive selection of  $\alpha\beta$  T cells [29,30,31]. Cross-linking of CD3 $\epsilon$  (a component of the TCR signalling complex) on DN3 thymocytes induces Id3 through a MAP kinase-dependent pathway [32]. Mice lacking *Id3* show mild defects in positive selection similar to those observed in mice lacking the Tec kinase *Itk*, which activates the MAP kinases *Erk1* and *Erk2* [33,34]. MAP kinase signalling is also important for proper  $\gamma\delta$  T cell development and Id3 is highly expressed in  $\gamma\delta$  T cells, although published data suggest that Id3 is not essential for  $\gamma\delta$  T cell development in mice expressing the KN6 (V $\gamma$ 2<sup>+</sup>V $\delta$ 5<sup>+</sup>) transgene [10]. Surprisingly however, it was reported that *Id3*<sup>-/-</sup> mice have an increased number of  $\gamma\delta$  T cells and it was hypothesized that Id3 functions in DN3 cells to prevent *Tcr* or *Tcrd* rearrangement in cells expressing a functional TCR $\beta$  [35].

Here we report that the elevated number of  $\gamma\delta$  T cells in *Id3*<sup>-/-</sup> mice is a consequence of an expanded population of V $\gamma$ 1.1<sup>+</sup>V $\delta$ 6.3<sup>+</sup> T cells. *Id3*<sup>-/-</sup> V $\gamma$ 1.1<sup>+</sup>V $\delta$ 6.3<sup>+</sup> T cells, like their wild-type (WT) counterparts, primarily develop from late embryonic or neonatal progenitors rather than adult DN3 cells. These  $\gamma\delta$  T cells have many of the characteristics of NKT cells previously noted, and we confirm that *Id3*<sup>-/-</sup> V $\gamma$ 1.1<sup>+</sup>V $\delta$ 6.3<sup>+</sup> T cells express the transcription factor promyelocytic leukemia zinc finger (PLZF) protein [36], a molecular determinant of the NKT cell fate [37,38] and their development required the Signaling lymphocyte adaptor molecule (Slam)-associated Adaptor Protein (SAP) [39]. Importantly, deletion of SAP overcomes all apparent thymic alterations in *Id3*<sup>-/-</sup> mice including the increased number of  $\gamma\delta$  T cells and the reduced thymic cellularity, whereas deletion of *Tcrd* had no effect on thymic cellularity. These observations indicate that Id3 plays a role in preventing expansion or survival of this SAP-dependent lymphocyte. Taken together, our data demonstrate that Id3 functions to limit the development of SAP-dependent “innate-like”  $\gamma\delta$  T cells.

## Results

### Development of CD4<sup>+</sup> and CD8<sup>+</sup> $\gamma\delta$ T Cells in *Id3*<sup>-/-</sup> Mice

While investigating the thymic phenotype of *Id3*<sup>-/-</sup> mice we discovered that the number of  $\gamma\delta$  T cells is increased by approximately 8-fold (range 3- to 15-fold) compared to *Id3*<sup>+/+</sup> mice (Fig. 1A and B). In contrast, the frequency of TCR $\beta$ <sup>high</sup> cells was similar among *Id3*<sup>+/+</sup> and *Id3*<sup>-/-</sup> thymocytes, although the number of TCR $\beta$ <sup>+</sup> cells is decreased in the absence of *Id3* since *Id3*<sup>-/-</sup> mice have a 3-fold decrease in thymocytes numbers (Fig. 1A and Fig. S1). Further analysis revealed that a large portion of *Id3*<sup>-/-</sup> TCR $\gamma$ <sup>+</sup> cells express CD4 or CD8 (Fig. 1C). Compared to *Id3*<sup>+/+</sup> mice, *Id3*<sup>-/-</sup> mice have an increased number of CD4 (80-fold) and CD8 (70-fold) TCR $\gamma$ <sup>+</sup> cells as well as DN

(5.5-fold) and DP (5-fold) TCR $\gamma$ <sup>+</sup> cells (Fig. 1D). *Id3*<sup>-/-</sup> TCR $\gamma$ <sup>+</sup> cells express CD8 as a CD8 $\alpha\alpha$  homodimer as opposed to the CD8 $\alpha\beta$  heterodimer expressed by TCR $\beta$ <sup>+</sup>CD8<sup>+</sup> cells (Fig. 1E). Importantly, *Id3*<sup>-/-</sup> TCR $\gamma$ <sup>+</sup> cells expressed significantly more mRNA for the transcription factor Sox13 than DP thymocytes indicating that these are bona fide  $\gamma\delta$  T cells [40] (Fig. 1F). In the spleen there is also a large population of TCR $\gamma$ <sup>+</sup> cells expressing CD4 or CD8 $\alpha\alpha$  that is markedly elevated compared to *Id3*<sup>+/+</sup> mice (Fig. S2). Taken together these data indicate that Id3 limits development of  $\gamma\delta$  T cells, in particular,  $\gamma\delta$  T cells expressing CD4 or CD8.

### *Id3*<sup>-/-</sup> $\gamma\delta$ T Cells Have an Activated or “Innate-Like” Phenotype

In light of our observations that *Id3*<sup>-/-</sup>  $\gamma\delta$  T cells expressed CD4 and CD8, we characterized these cells for expression of multiple cell surface proteins. In the thymus, the majority of *Id3*<sup>-/-</sup> DN TCR $\gamma$ <sup>+</sup> cells had high expression of CD122, NK1.1 and CD44 and low expression of CD24 compared with *Id3*<sup>+/+</sup> TCR $\gamma$ <sup>+</sup> cells (Fig. 2A and B). This phenotype is associated with activation of  $\alpha\beta$  and  $\gamma\delta$  T cells [41,42,43]. Notably, a majority of the *Id3*<sup>-/-</sup> NK1.1<sup>+</sup> TCR $\gamma$ <sup>+</sup> cells expressed TCR $\gamma$  at low levels (Fig. 2B). A subset of  $\gamma\delta$  T cells expressing NK1.1 with low expression of TCR $\gamma\delta$  is present in the spleen of WT mice and presumably represent activated  $\gamma\delta$  T cells [42]. Similar to *Id3*<sup>-/-</sup> DN TCR $\gamma\delta$ <sup>+</sup> cells, a portion of *Id3*<sup>-/-</sup> CD4 and CD8  $\gamma\delta$  T cells had these activation markers, although the CD4 cells had lower levels of CD122 and only a small portion expressed NK1.1 (Fig. 2B). Therefore, our data indicate that a large portion of the  $\gamma\delta$  T cells in the thymus of *Id3*<sup>-/-</sup> mice have an activated phenotype. The DN, CD4 and CD8  $\gamma\delta$  T cells in the spleen of *Id3*<sup>-/-</sup> mice also have an activated phenotype (Fig. S3).

A subset of CD122<sup>+</sup>  $\gamma\delta$  T cells, which are thought to have encountered ligand in the thymus, produce IFN $\gamma$  rapidly after *in vitro* stimulation [43]. To determine whether *Id3*<sup>-/-</sup>  $\gamma\delta$  T cells represent previously activated cells we tested their ability to make IFN $\gamma$  after *in vitro* stimulation with PMA and ionomycin for 5 hours. Importantly >30% of *Id3*<sup>-/-</sup> TCR $\gamma$ <sup>+</sup> thymocytes produce IFN $\gamma$  under these conditions. In contrast only 2.5% of *Id3*<sup>+/+</sup> TCR $\gamma$ <sup>+</sup> thymocytes produced IFN $\gamma$  at this early time point (Fig. 2C). Similarly, more than 50% of *Id3*<sup>-/-</sup> splenic TCR $\gamma$ <sup>+</sup> cells produced IFN $\gamma$  (Fig. S3). Interestingly, a subset of *Id3*<sup>-/-</sup>  $\gamma\delta$  T cells make both IFN $\gamma$  and IL-4 (Fig. S4). Cytometric bead analysis revealed that *Id3*<sup>-/-</sup>  $\gamma\delta$  T cells also make more IFN $\gamma$ , IL4, IL10 and IL13 than their WT counterparts after stimulation with anti-TCR $\gamma$  (Fig. S4). Taken together, our data demonstrate that *Id3*<sup>-/-</sup> mice develop a large population of  $\gamma\delta$  T cells that show characteristics of previously activated cells.

### *Id3*<sup>-/-</sup> $\gamma\delta$ T Cells with an Activated Phenotype Develop Early in Post-Natal Life

To determine when during ontogeny *Id3*<sup>-/-</sup>  $\gamma\delta$  T cell numbers increase and when the activated phenotype becomes evident, we examined thymocytes from mice isolated 1 week after birth. At this stage of ontogeny, few thymocytes have left the thymus and therefore peripheral activation is unlikely to have impacted on thymocyte numbers or phenotype. Importantly, a 10-fold increase in TCR $\gamma$ <sup>+</sup> cells was observed in *Id3*<sup>-/-</sup> neonates and the aberrant expression of CD4 was already evident (Fig. 3A, B and C). Moreover, *Id3*<sup>-/-</sup> neonatal  $\gamma\delta$  T cells had an activated phenotype similar to that observed in the adult *Id3*<sup>-/-</sup> thymus (Fig. 3D and E), although only a small subset of these cells were positive for NK1.1. Taken together, our data indicate that Id3 limits the development of  $\gamma\delta$  T cells with an activated phenotype

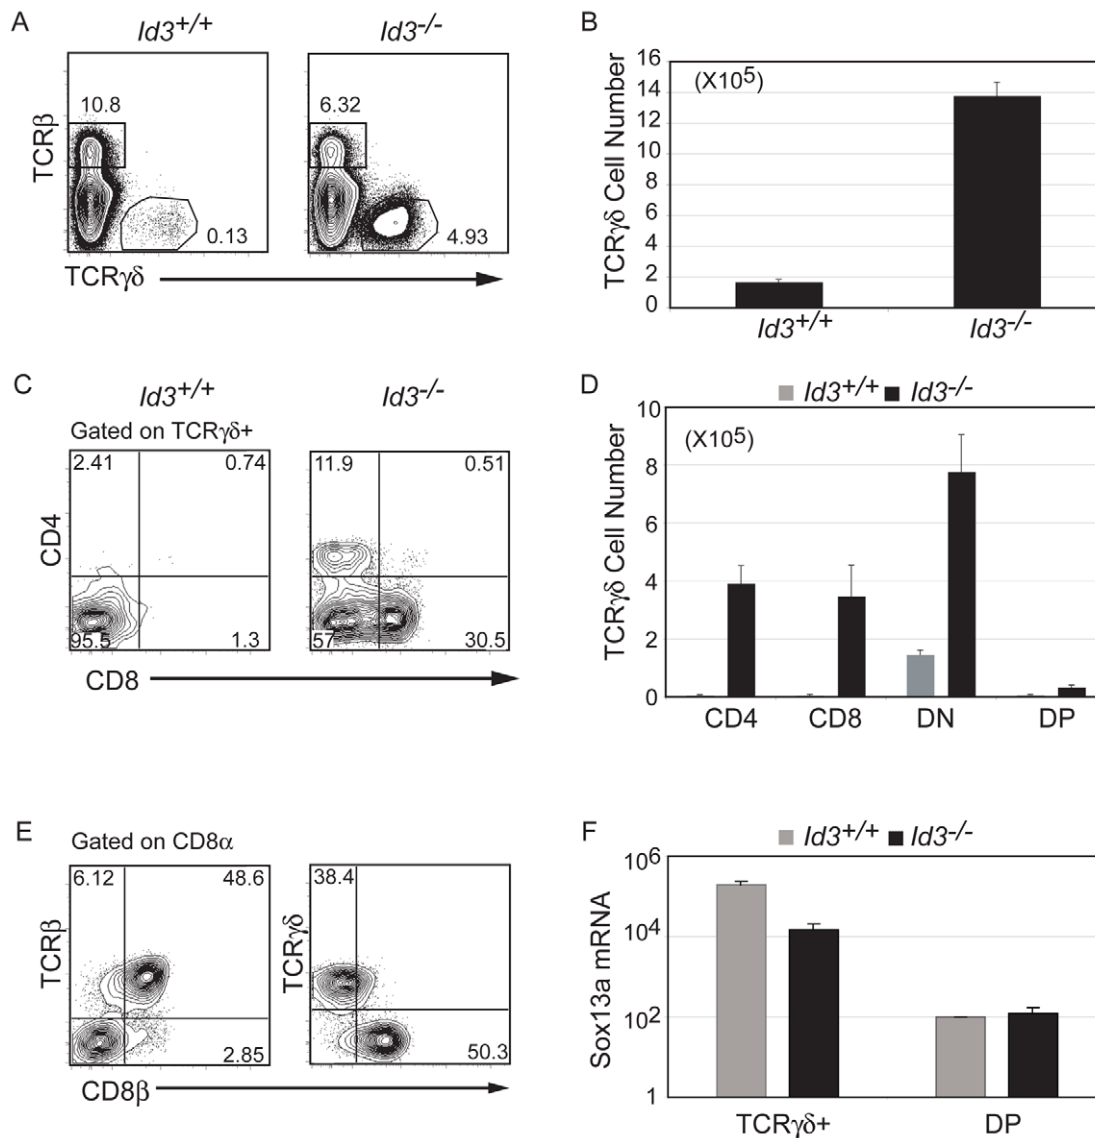

**Figure 1. Altered  $\gamma\delta$  T cell development in *Id3*<sup>-/-</sup> mice.** A) FACS analysis for TCR $\beta$  and TCR $\gamma\delta$  on *Id3*<sup>+/+</sup> and *Id3*<sup>-/-</sup> thymocytes. The frequency of TCR $\beta^+$  cells and TCR $\gamma\delta^+$  cells is shown. B) Number of TCR $\gamma\delta^+$  cells in the thymus of *Id3*<sup>+/+</sup> and *Id3*<sup>-/-</sup> mice. Average  $\pm$  standard deviation was determined from >15 mice.  $p < 0.0005$ . C) CD4 and CD8 expression on TCR $\gamma\delta^+$  cells. D) Number of CD4, CD8, DN and DP TCR $\gamma\delta^+$  cells in the thymus *Id3*<sup>+/+</sup> (grey) and *Id3*<sup>-/-</sup> (black) mice. Average  $\pm$  standard deviation was determined from >15 mice.  $p < 0.0005$  in all *Id3*<sup>+/+</sup> to *Id3*<sup>-/-</sup> comparisons. E) Analysis of *Id3*<sup>-/-</sup> CD8 $\alpha^+$  thymocytes for TCR $\beta$  and CD8 $\beta$  (left panel) or TCR $\gamma$  (right panel) and CD8 $\beta$ . The TCR $\beta^+$  cells express CD8 $\beta$  whereas TCR $\gamma\delta^+$  cells are CD8 $\beta^-$  (right panel) and presumably CD8 $\alpha\alpha$ . F) QPCR for Sox13a mRNA in sorted *Id3*<sup>+/+</sup> (grey) and *Id3*<sup>-/-</sup> (black) TCR $\gamma^+$  cells and DP thymocytes (standardized to *Hprt*). Bars are the average from 3 experiments  $\pm$  standard deviation. doi:10.1371/journal.pone.0009303.g001

in neonatal mice. Our data also indicate that the activated phenotype of *Id3*<sup>-/-</sup>  $\gamma\delta$  T cells likely occurs within the thymus rather than as a consequence of peripheral activation since few thymocytes have left the thymus within the first week after birth [44].

### The Majority of *Id3*<sup>-/-</sup> $\gamma\delta$ T Cells Express V $\gamma$ 1.1 and V $\delta$ 6.3

The presence of a large population of activated  $\gamma\delta$  T cells in the *Id3*<sup>-/-</sup> neonatal thymus suggests that these cells derive from cells that underwent V(D)J recombination in the late embryonic or neonatal period. To gain insight into the origin of the majority of *Id3*<sup>-/-</sup>  $\gamma\delta$  T cells, we examined their TCR repertoire by staining with a panel of anti-V $\gamma$  antibodies. This analysis revealed that >90% of  $\gamma\delta$  T cells in the *Id3*<sup>-/-</sup> thymus express V $\gamma$ 1.1 (Fig. 4A,

B). This increase in V $\gamma$ 1.1 usage is not at the expense of the other V $\gamma$  gene segments since the total number of V $\gamma$ 2<sup>+</sup> and V $\gamma$ 5<sup>+</sup>  $\gamma\delta$  T cells are similar to that in the *WT* thymus, although their frequency within the  $\gamma\delta$  T cell population is reduced (Fig. 4C).

Importantly, the majority of V $\gamma$ 1.1<sup>+</sup> cells in the *Id3*<sup>-/-</sup> thymus co-express V $\delta$ 6.3 (Fig. 4A). V $\gamma$ 1.1<sup>+</sup>V $\delta$ 6.3<sup>+</sup>  $\gamma\delta$  T cells have been reported to be of late fetal origin, express CD4 and have an activated phenotype including high expression of CD44, low expression of CD24 with rapid production of IFN $\gamma$  and IL4 similar to what we have observed with *Id3*<sup>-/-</sup>  $\gamma\delta$  T cells [22]. These observations lead us to conclude that *Id3* deficiency allows for an increase in the number of V $\gamma$ 1.1<sup>+</sup>V $\delta$ 6.3<sup>+</sup>  $\gamma\delta$  T cells without a major effect on V $\gamma$ 2<sup>+</sup> or V $\gamma$ 5<sup>+</sup>  $\gamma\delta$  T cells.

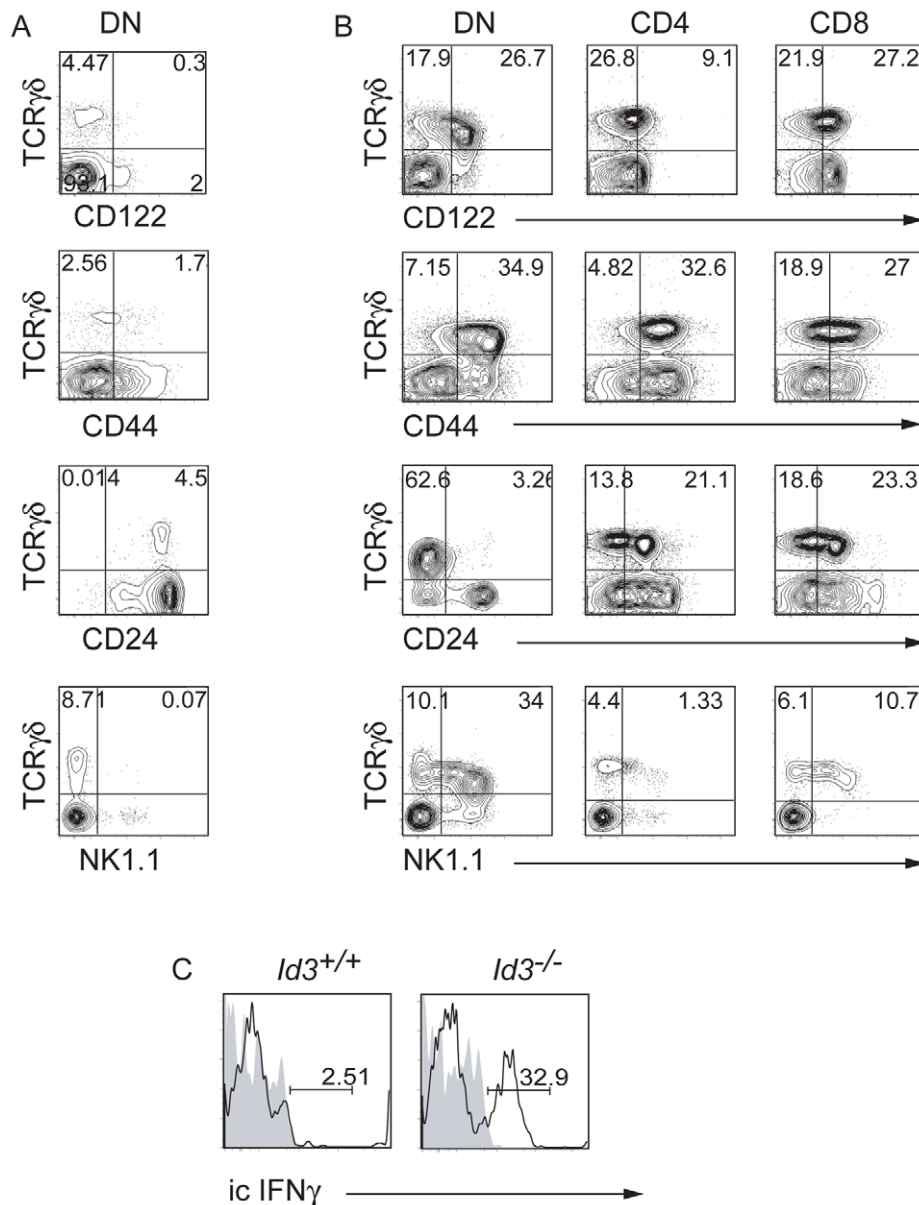

**Figure 2. *Id3*<sup>-/-</sup>  $\gamma\delta$  T cells have an activated phenotype.** FACS analysis of *Id3*<sup>+/+</sup> DN thymocytes (A) or *Id3*<sup>-/-</sup> DN, CD4 and CD8 thymocytes (B) for expression of TCR $\gamma\delta$  and CD122, CD44, CD24 or NK1.1. The analysis shows that *Id3*<sup>-/-</sup>  $\gamma\delta$  T cells have markers of activation independent of expression of CD4 or CD8. Data are representative of >10 experiments. C) FACS analysis showing intracellular staining for IFN $\gamma$  (open histogram) in *Id3*<sup>+/+</sup> and *Id3*<sup>-/-</sup> TCR $\gamma\delta$ <sup>+</sup> thymocytes 5 hours after stimulation with PMA and ionomycin. Shaded histogram shows isotype control. One of 3 experiments is shown.

doi:10.1371/journal.pone.0009303.g002

### Limited Diversity in V $\gamma$ 1.1-J $\gamma$ 4 and V $\delta$ 6-J $\delta$ 1 Rearrangements in *Id3*<sup>-/-</sup> $\gamma\delta$ T Cells

In WT mice V $\gamma$ 1.1<sup>+</sup>V $\delta$ 6.3<sup>+</sup> T cells develop from fetal precursors that rearrange the  $\gamma$  and the  $\delta$  chains in late embryonic life [23]. These cells show frequent rearrangement of the V $\gamma$ 1.1 variable gene segment to the J $\gamma$ 4 joining segment and of V $\delta$ 6.3 to J $\delta$ 1 and, depending on the genetic background of the mice, can have oligoclonal or polyclonal junctional sequences [45,46]. To gain insight into the complexity of the rearrangements in *Id3*<sup>-/-</sup> V $\gamma$ 1.1<sup>+</sup>V $\delta$ 6.3<sup>+</sup> cells we amplified and sequenced the V $\gamma$ 1.1-J $\gamma$ 4 and V $\delta$ 6-J $\delta$ 1 junctions in the TCR $\gamma$ <sup>+</sup> population. Analysis of V $\gamma$ 1.1-J $\gamma$ 4 junctions revealed that 30 of 31 sequences were in-frame and consisted of only two unique sequences indicating a

population of V $\gamma$ 1.1<sup>+</sup> T cells lacking significant TCR diversity. In addition, these sequences lacked N nucleotide additions suggesting that the rearrangements occurred in the absence of TdT (Fig. 5A). Analysis of V $\delta$ 6-J $\delta$ 1 junctions also revealed a lack of diversity with 32 of 37 in-frame sequences containing the V $\delta$ 6.3 gene segment, consistent with our flow cytometry analysis (Fig. 5B). Moreover, 21 of the 32 V $\delta$ 6.3-J $\delta$ 1 junctions are represented by only two sequences. In the majority of sequences the D $\delta$ 2-J $\delta$ 1 and V $\delta$ 6-D $\delta$ 2 junctions resulted in maintenance of the germline sequence and the D $\delta$ 1 gene segment was not observed in these junctions (Fig. 5B). Of the 4 unique sequences that showed diversity following the V $\delta$ 6.3 gene segment at least 2 represent potential P rather than N nucleotide additions. Notably, the invariable

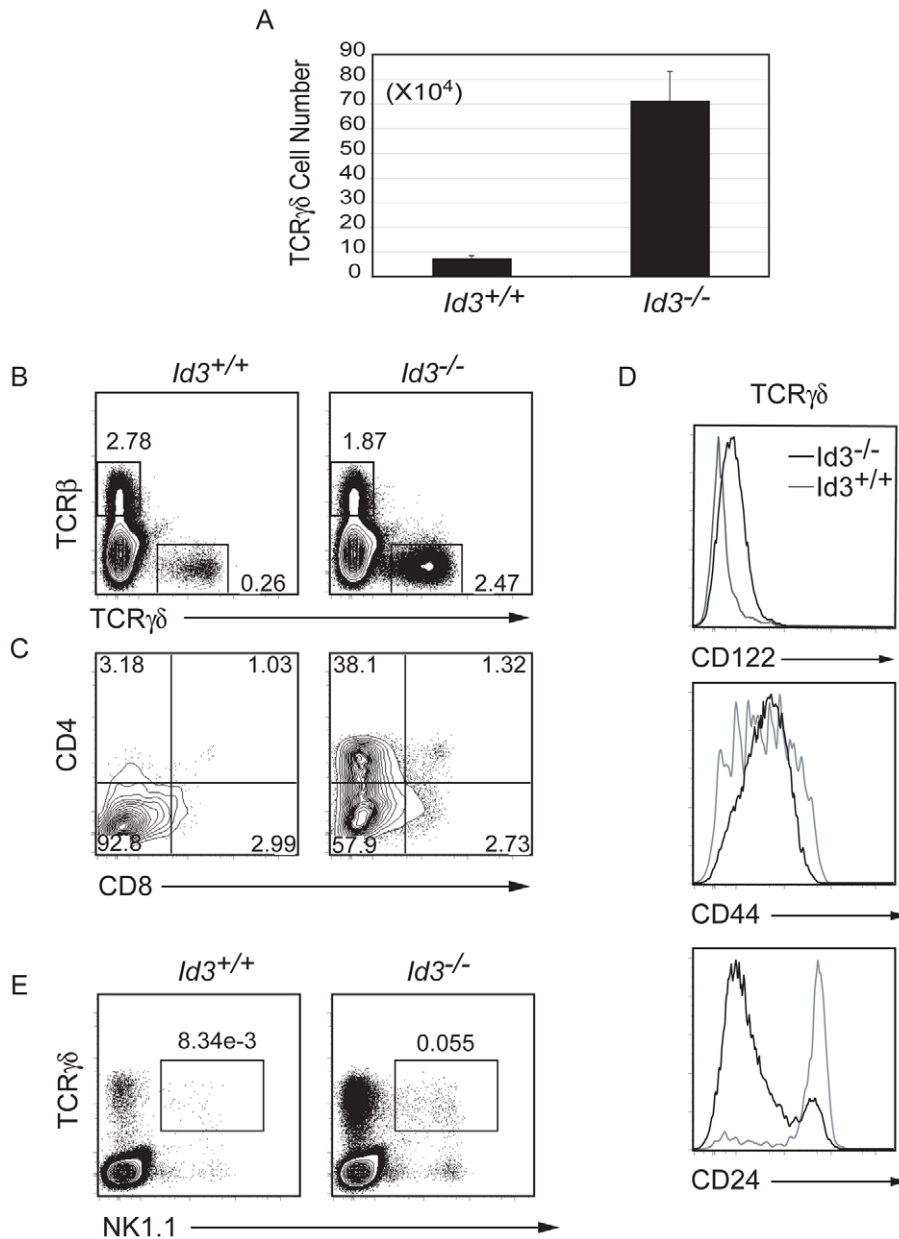

**Figure 3.  $\gamma\delta$  T cells with an activated phenotype are present in *Id3*<sup>-/-</sup> neonates.** A)  $\gamma\delta$  T cell numbers in *Id3*<sup>+/+</sup> and *Id3*<sup>-/-</sup> mice analyzed 7 days after birth. Average  $\pm$  standard deviation is derived from 6 mice.  $p < 0.0005$ . B) TCR $\beta$  and TCR $\gamma\delta$  expression on total thymocytes from 7 day old mice. C) Gated TCR $\gamma\delta$ <sup>+</sup> cells were analyzed for CD4 and CD8. D) Expression of CD122, CD44 or CD24 on TCR $\gamma\delta$ <sup>+</sup> thymocytes from 7 day old *Id3*<sup>+/+</sup> (grey) and *Id3*<sup>-/-</sup> (black line) littermates. E) TCR $\gamma\delta$  and NK1.1 expression total thymocytes from the same pair of mice as in D. doi:10.1371/journal.pone.0009303.g003

D $\delta$ 2-J $\delta$ 1 junction forces a unique reading frame of the D $\delta$ 2 segment (V/IGGIRA), which contributes to the CDR3 domain [47], thus resulting in a highly invariant V $\gamma$ 1.1<sup>+</sup>V $\delta$ 6.3<sup>+</sup> TCR, at least for those cells using the V $\gamma$ 1.1-J $\gamma$ 4 and V $\delta$ 6-J $\delta$ 1 rearrangement. The presence of a highly invariant receptor on cells with an activated phenotype suggests that the V $\gamma$ 1.1<sup>+</sup>V $\delta$ 6.3<sup>+</sup> T cells are selected by a ligand present in the thymus.

To examine the possibility that the V $\gamma$ 1.1<sup>+</sup>V $\delta$ 6.3<sup>+</sup> T cells in *Id3*<sup>-/-</sup> mice arise as a consequence of preferential V $\gamma$ 1.1 and V $\delta$ 6.3 rearrangement in adult thymocytes we analyzed the V $\gamma$ 1.1-J $\gamma$ 4 and V $\delta$ 6-J $\delta$ 1 junctions in unselected *Id3*<sup>-/-</sup> DN3 cells. This analysis revealed that the in-frame V $\gamma$ 1.1-J $\gamma$ 4 rearrangements (8/15) contained 3 unique sequences that were distinct from those

amplified from *Id3*<sup>-/-</sup>  $\gamma\delta$  T cells (Fig. 5A). In addition, only 3 of 16 V $\delta$ 6-J $\delta$ 1 junctions were in-frame and each of these sequences was unique with one sequence containing the V $\delta$ 6B gene segment (Fig. 5B). Therefore, *Id3*<sup>-/-</sup> DN3 cells show no evidence of a preferential production of the V $\gamma$ 1.1-J $\gamma$ 4 or V $\delta$ 6.3-J $\delta$ 1 junctions used in the  $\gamma\delta$  T cells in *Id3*<sup>-/-</sup> mice. Further, if a small number of V $\gamma$ 1.1<sup>+</sup>V $\delta$ 6.3<sup>+</sup>  $\gamma\delta$  T cells with this rearrangement developed in the adult and expanded we would expect this population of  $\gamma\delta$  T cells to incorporate more BrdU than WT  $\gamma\delta$  T cells. However, multiple in vivo BrdU incorporation experiments failed to reveal an increase in proliferation of *Id3*<sup>-/-</sup>  $\gamma\delta$  T cells (Fig. S5) [35]. Taken together, our results indicate that in the absence of Id3 there is an elevated number of V $\gamma$ 1.1<sup>+</sup>V $\delta$ 6.3<sup>+</sup>  $\gamma\delta$  T cells that

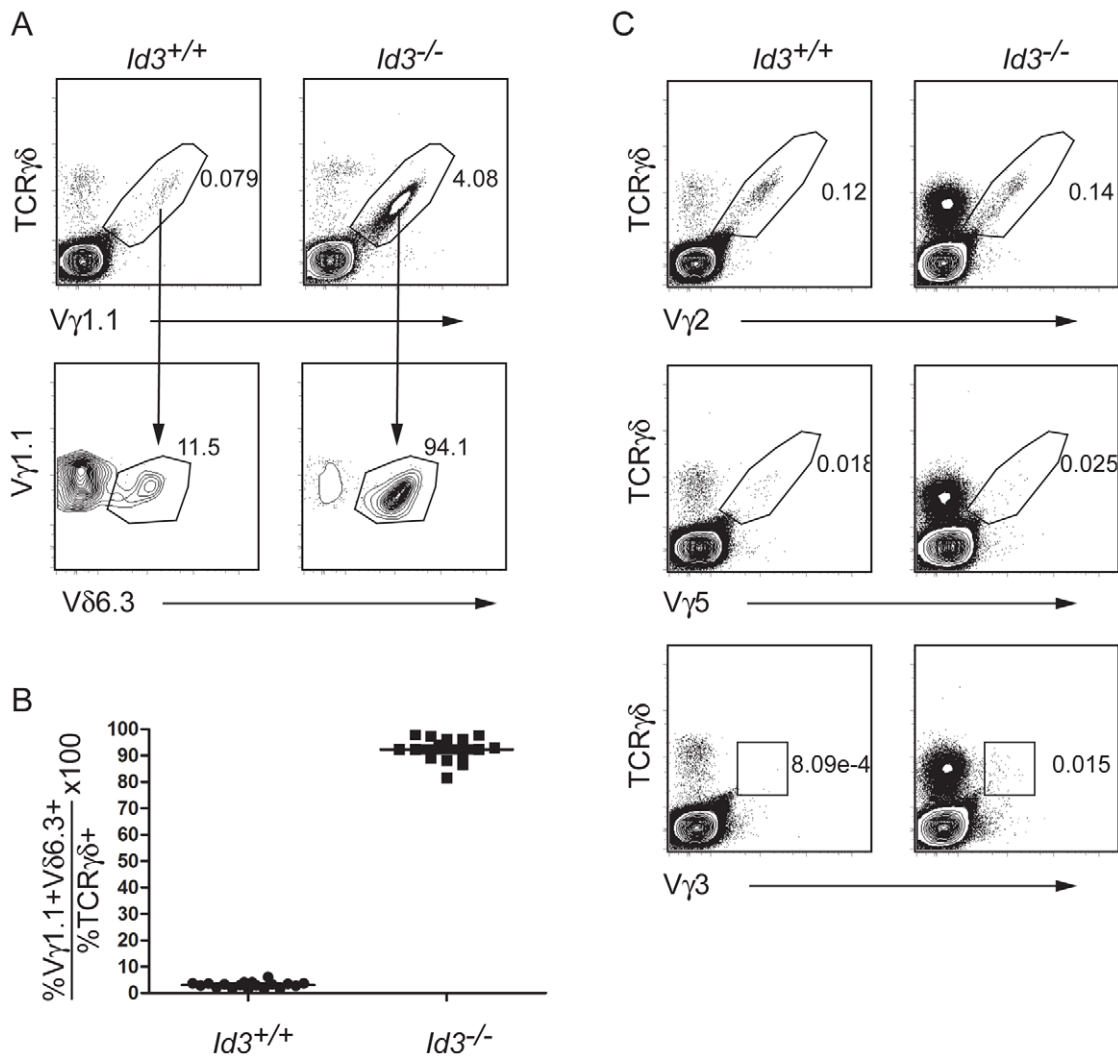

**Figure 4.** *Id3*<sup>-/-</sup>  $\gamma\delta$  T cells are highly enriched for cells with a V $\gamma$ 1.1/V $\delta$ 6.3 TCR. **A**) FACS analysis of thymocytes for TCR $\gamma\delta$  and V $\gamma$ 1.1 (top panel). The frequency of TCR $\gamma\delta$ <sup>+</sup>V $\gamma$ 1.1<sup>+</sup> cells is shown. TCR $\gamma\delta$ <sup>+</sup>V $\gamma$ 1.1<sup>+</sup> cells were analyzed for expression of V $\delta$ 6.3 (bottom panel). The frequency of V $\gamma$ 6.3<sup>+</sup> cells in the TCR $\gamma\delta$ <sup>+</sup>V $\gamma$ 1.1<sup>+</sup> population is shown. **B**) Frequency of V $\gamma$ 1.1<sup>+</sup>V $\delta$ 6.3<sup>+</sup> cells among TCR $\gamma\delta$ <sup>+</sup> cells in *Id3*<sup>+/+</sup> and *Id3*<sup>-/-</sup> mice. Data were calculated by dividing the frequency of V $\gamma$ 1.1<sup>+</sup>V $\delta$ 6.3<sup>+</sup> cells by the frequency of TCR $\gamma\delta$ <sup>+</sup> cells ( $\times 100$ ). Each dot represents the frequency from one mouse. The line represents the average value. **C**) Analysis of thymocytes for expression of TCR $\gamma\delta$  and V $\gamma$ 2, V $\gamma$ 5 or V $\gamma$ 3 in *Id3*<sup>+/+</sup> and *Id3*<sup>-/-</sup> thymocytes. One of 4 representative experiments is shown. doi:10.1371/journal.pone.0009303.g004

originate during late fetal or neonatal life. Consistent with this conclusion, reconstitution of *WT* or *Id3*<sup>-/-</sup> mice with adult *Id3*<sup>-/-</sup> bone marrow hematopoietic stem and progenitor cells largely fails to reconstitute this  $\gamma\delta$  T cell population (**Fig. S6**).

#### Development of Activated $\gamma\delta$ T Cells in *Id3*<sup>-/-</sup> Mice Requires SAP

A subset of V $\gamma$ 1.1<sup>+</sup>V $\delta$ 6.3<sup>+</sup>, referred to as  $\gamma\delta$  NKT, share phenotypic and functional characteristics with NKT cells including expression of the transcription factor PLZF and a requirement for SAP-dependent [24,37,39,48]. However, some V $\gamma$ 1.1<sup>+</sup>V $\delta$ 6.3<sup>+</sup> T cells develop independent of SAP signaling [24]. To further establish the parallels between *Id3*<sup>-/-</sup> V $\gamma$ 1.1<sup>+</sup>V $\delta$ 6.3<sup>+</sup> cells and NKT cells we investigated the expression of PLZF. Importantly, PLZF was highly expressed in these cells compared to V $\gamma$ 1.1<sup>-</sup>V $\delta$ 6.3<sup>-</sup>  $\gamma\delta$  T cells, in both the *Id3*<sup>+/+</sup> and the *Id3*<sup>-/-</sup> thymus (**Fig. 6A**). We examined whether development of this activated  $\gamma\delta$  T cell population in *Id3*<sup>-/-</sup> mice requires SAP by

generating *Id3*<sup>-/-</sup>*Sh2d1a*<sup>-/-</sup> mice. Strikingly, the total number of  $\gamma\delta$  T cells in *Id3*<sup>-/-</sup>*Sh2d1a*<sup>-/-</sup> mice was similar to that in *WT* and *Sh2d1a*<sup>-/-</sup> mice (**Fig. 6B and C**). Moreover, the frequency of V $\gamma$ 1.1<sup>+</sup>V $\delta$ 6.3<sup>+</sup>  $\gamma\delta$  T cells in *Id3*<sup>-/-</sup>*Sh2d1a*<sup>-/-</sup> mice was similar to *WT* and *Id3*<sup>-/-</sup>*Sh2d1a*<sup>-/-</sup>  $\gamma\delta$  T cells showed no evidence of an activated phenotype (**Fig. 6D and Fig. S7**). Therefore, activation of the SAP signaling pathway is essential for the  $\gamma\delta$  T cell phenotype observed in *Id3*<sup>-/-</sup> mice. These data indicate that SAP is essential for development or survival of the V $\gamma$ 1.1<sup>+</sup>V $\delta$ 6.3<sup>+</sup> T cells present in *Id3*<sup>-/-</sup> mice. Interestingly, all of the observed alterations in the *Id3*<sup>-/-</sup> thymus were normalized by deletion of *Sh2d1a*. That is,  $\gamma\delta$  T cell numbers and phenotype as well as total thymocytes numbers are similar to *WT* in *Id3*<sup>-/-</sup>*Sh2d1a*<sup>-/-</sup> mice (**Fig. S7**). This finding is striking because deletion of  $\gamma\delta$  T cells in *Id3*<sup>-/-</sup> mice, by creating *Id3*<sup>-/-</sup>*Tcrd*<sup>-/-</sup> mice, does not restore thymic cellularity to *WT* levels (**Fig. S8**). Therefore, multiple alterations in the *Id3*<sup>-/-</sup> thymus are dependent on SAP signaling.

**A**

|          | Vγ1.1          | P/N       | Jγ4             |
|----------|----------------|-----------|-----------------|
| germline | GTC TGG ATA AA |           | TCA GGC ACA     |
| TCRγδ    | GTC TGG AT     |           | CA GGC ACA (24) |
|          | GTC TGG        |           | TCA GGC ACA (6) |
| DN3      | GTC TGG ATA AA | A TCC AGA | TCA GGC ACA (5) |
|          | GTC TGG AT     |           | A GGC ACA (2)   |
|          | GTC TGG ATA A  | G         | C ACA (1)       |

  

**B**

|            | Vδ6.3                 | P/N            | Dδ1        | P/N                | Dδ2                | P/N            | Jδ1                 |
|------------|-----------------------|----------------|------------|--------------------|--------------------|----------------|---------------------|
| germline   | GTC CTC TGG GAG CTG G |                | ATGGCATAT  |                    | ATCGGAGGGATACGAG   |                | CT ACC GAC AAA      |
| TCRγδ      | GTC CTC TGG GAG CTG G |                |            |                    | TCGGAGGGATACGAG    |                | CT ACC GAC AAA (11) |
|            | <b>A L W E L V</b>    |                |            |                    | <b>G G I R A</b>   |                | <b>T D K</b>        |
|            | GTC CTC TGG GAG       | TTT            |            |                    | ATCGGAGGGATACGAG   |                | CT ACC GAC AAA (10) |
|            | <b>A L W E F</b>      |                |            |                    | <b>I G G I R A</b> |                | <b>T D K</b>        |
|            | GTC CTC TGG GAG C     | <u>AT</u>      |            |                    | ATCGGAGGGATACGAG   |                | CT ACC GAC AAA (6)  |
|            | <b>A L W E H</b>      |                |            |                    | <b>I G G I R A</b> |                | <b>T D K</b>        |
|            | GTC CTC TGG GAG CT    | <u>T</u>       |            |                    | ATCGGAGGGATACGAG   |                | CT ACC GAC AAA (3)  |
|            | <b>A L W E L</b>      |                |            |                    | <b>I G G I R A</b> |                | <b>T D K</b>        |
|            | GTC CTC TGG GAG CTG G |                |            |                    | GGATACGAG          |                | CT ACC GAC AAA (1)  |
|            | <b>A L W E L G</b>    |                |            |                    | <b>I R A</b>       |                | <b>T D K</b>        |
|            | GCT CTC TGG GAG C     | GGGCCCGG       |            |                    | ATCGGAGGGATA       | GG             | C GAC AAA (1)       |
|            | <b>A L W E R</b>      | <b>A R</b>     |            |                    | <b>I G G I</b>     | <b>G</b>       | <b>D K</b>          |
|            | TCG GAA C             | GCGATA         | TGGCATAT   | AAGGGG             | CGGAGGGATACGAG     |                | C GAC AAA (3) Vδ6B  |
|            | <b>S E R</b>          | <b>D M</b>     | <b>G Y</b> | <b>K G</b>         | <b>R R D T S</b>   |                | <b>D K</b>          |
|            | TCG GA                | CCCTCTA        | TGGCAT     |                    | ATCGGAGGGATACGAG   | CTCCCT         | C GAC AAA (1)       |
| <b>S D</b> | <b>P L</b>            | <b>W H</b>     |            | <b>I G G I R A</b> | <b>P L</b>         | <b>D K</b>     |                     |
| TCG G      | <u>T</u>              | GTGGCATAT      | ACCA       | GGAGGGATACGAG      | TTACTA             | CC GAC AAA (1) |                     |
| <b>S V</b> |                       | <b>W H I P</b> |            | <b>G G I R V</b>   | <b>T T</b>         | <b>D K</b>     |                     |
| DN3        | GTC CTC TGG GAG C     | <u>AT</u>      |            |                    | ATCGGAGGGATACGAG   |                | CT ACC GAC AAA (1)  |
|            | <b>A L W E H</b>      |                |            |                    | <b>I G G I R A</b> |                | <b>T D K</b>        |
|            | GTC CTC TGG GAG C     | CCTATA         | TGGCAT     |                    | ATCGGAGGGATAC      |                | C GAC AAA (1)       |
|            | <b>A L W E P</b>      | <b>Y M</b>     | <b>A Y</b> |                    | <b>R R D T</b>     |                | <b>D K</b>          |
|            | TCG GA                | CCCTCTA        | TGGCATC    | CT                 | ATCGGAGGGATACGAG   | CTCCCGT        | C GAC AAA (1) Vδ6B  |
| <b>S D</b> | <b>P L</b>            | <b>W H P</b>   |            | <b>I G G I R A</b> | <b>P V</b>         | <b>D K</b>     |                     |

**Figure 5. Sequence analysis of Vγ1.1-Jγ4 and Vδ6-Jδ1 junctions.** Sequence of Vγ1.1 and Jγ4 (A) or Vδ6 and Jδ1 (B) junctions from TCRγδ<sup>+</sup> T cells (upper, indicated on the right) or DN3 thymocytes (lower, indicated on the right). Data are cumulative from 2 independent experiments in which DNA was isolated from 50,000 TCRγδ<sup>+</sup> cells and 30,000 Lin<sup>-</sup>c-kit<sup>-</sup>CD25<sup>+</sup> (DN3) cells. In each experiment 3 independent PCR amplifications were performed on each population and cloned into pBSK for sequencing. A minimum of 30 sequences were analyzed for each population. Results from the two experiments were essentially identical. Only in-frame sequences are shown and the number of clones sharing the identical sequence is indicated on the right in parenthesis. The amino acid sequence is shown in bold below the DNA sequence. The Vδ6.3 primer also amplifies the Vδ6B gene segment and sequences derived from Vδ6B are indicated on the right. P/N represent potential P or N additions and the underlined sequences are potential P additions. Sequences derived from the Dδ1 and Dδ2 gene segments are also indicated. doi:10.1371/journal.pone.0009303.g005

**Development of Activated γδ T Cells in *Id3*<sup>-/-</sup> Mice Requires *E2A***

*Id3* is a transcriptional repressor that prevents E proteins from binding DNA [49]. All of the E proteins are expressed in T cells; however, deletion of *E2A* is sufficient to restore αβ T cell maturation defects in *Id3*<sup>-/-</sup> [50]. Therefore, we tested the requirement for *E2A* in the development of activated γδ T cells in *Id3*<sup>-/-</sup> mice by generating *Id3*<sup>-/-</sup>*E2A*<sup>-/-</sup> mice. Consistent with a previous study we found that *E2A* is required for development of normal numbers of γδ T cells (Fig. 7A and B) [51]. Importantly, mice that lack both *Id3* and *E2A* have fewer γδ T cells than *WT* mice but more γδ T cells than *E2A*<sup>-/-</sup> mice (Fig. 7A and B). Nonetheless, the γδ T cells that develop in *Id3*<sup>-/-</sup>*E2A*<sup>-/-</sup> mice

fail to express CD122 and NK1.1 (Fig. 7C) Therefore, *E2A* is required for the development of γδ T cells with an activated phenotype in *Id3*<sup>-/-</sup> mice.

**Discussion**

In this study, we report that *Id3*-deficiency results in a 8-fold increase in the number of γδ T cells in the thymus and that the majority of these cells likely express an invariant Vγ1.1<sup>+</sup>Vδ6.3<sup>+</sup> TCR. Similar to WT Vγ1.1<sup>+</sup>Vδ6.3<sup>+</sup> cells, *Id3*<sup>-/-</sup> γδ T cells have high expression of CD122, CD44 and NK1.1, low expression of CD24, and rapidly secrete IFNγ and IL4 after *in vitro* stimulation. The “activated” phenotype of these γδ T cells parallels that of NKT cells, a finding that has led to the hypothesis that

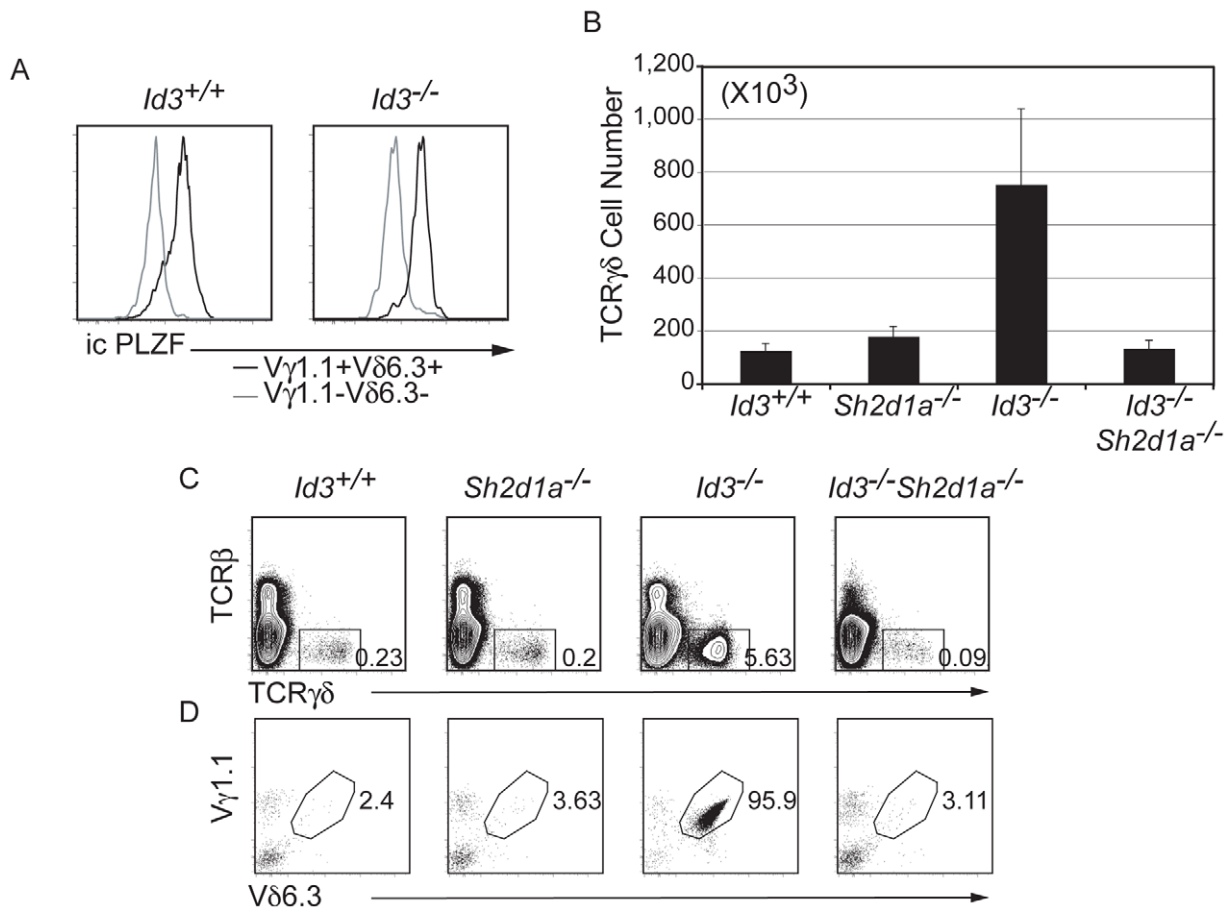

**Figure 6. *Id3*<sup>-/-</sup> V $\gamma$ 1.1+V $\delta$ 6.3+ T cells express PLZF and require SAP.** A) Intracellular FACS analysis for expression of PLZF in *Id3*<sup>+/+</sup> and *Id3*<sup>-/-</sup> thymic V $\gamma$ 1.1+V $\delta$ 6.3<sup>+</sup> (black) and V $\gamma$ 1.1<sup>-</sup>V $\delta$ 6.3<sup>-</sup> (grey)  $\gamma\delta$  T cells. (B) Number of TCR $\gamma\delta$ <sup>+</sup> cells in the thymus of mice of the indicated genotype. *Sh2d1a*<sup>-/-</sup> mice fail to express the gene encoding SAP. Average  $\pm$  standard deviation derived from 6 mice. *Id3*<sup>-/-</sup> mice have more TCR $\gamma\delta$ <sup>+</sup> cells than any of the other genotypes ( $p < 0.05$ ). (C) FACS analysis for TCR $\beta$  and TCR $\gamma$  expression on total thymocytes from mice of the indicated genotype. The frequency of TCR $\gamma\delta$ <sup>+</sup> cells is shown. (D) Analysis of TCR $\gamma\delta$ <sup>+</sup> cells for expression of V $\gamma$ 1.1 and V $\delta$ 6.3. The frequency of V $\gamma$ 1.1+V $\delta$ 6.3<sup>+</sup> cells among TCR $\gamma\delta$ <sup>+</sup> cells is shown.

doi:10.1371/journal.pone.0009303.g006

V $\gamma$ 1.1+V $\delta$ 6.3<sup>+</sup> T cells represent an innate branch within the  $\gamma\delta$  T cell lineage [25]. Here, we demonstrate that both *Id3*<sup>+/+</sup> and *Id3*<sup>-/-</sup> V $\gamma$ 1.1+V $\delta$ 6.3<sup>+</sup> cells express the transcription factor PLZF, a molecular determinant of the NKT cell fate [37]. Moreover, we find that SAP is essential for development of *Id3*<sup>-/-</sup> V $\gamma$ 1.1+V $\delta$ 6.3<sup>+</sup> T cells, as is the case for NKT cells [39,52,53]. We, and others, have found that the majority of adult  $\gamma\delta$  T cells in *Id3*<sup>-/-</sup> mice proliferate at a rate similar to WT  $\gamma\delta$  T cells indicating that the *Id3*<sup>-/-</sup> V $\gamma$ 1.1+V $\delta$ 6.3<sup>+</sup> population is not increased because of extensive proliferation in the adult thymus [35], rather, we conclude that these  $\gamma\delta$  T cells expand during neonatal life. Our data are consistent with a model in which Id3 controls the response of V $\gamma$ 1.1+V $\delta$ 6.3<sup>+</sup> T cells to ligand- and/or SAP-mediated proliferation.

We demonstrate that the increased number of  $\gamma\delta$  T cells in *Id3*<sup>-/-</sup> mice is attributed to the increase in SAP-dependent cells. Deletion of *Sh2d1a* in *Id3*<sup>-/-</sup> mice abrogated the increase in  $\gamma\delta$  T cell numbers and the activated phenotype. Therefore, the major effect of *Id3*-deficiency on  $\gamma\delta$  T cell development is an increase in embryonically derived V $\gamma$ 1.1+V $\delta$ 6.3<sup>+</sup> T cells. This conclusion is in contrast to a previous report suggesting that alterations in adult DN3 cells underlie the increased production of  $\gamma\delta$  T cells in *Id3*<sup>-/-</sup> mice [35]. This conclusion was based, in part, on the

observation that *Id3*<sup>-/-</sup>  $\gamma\delta$  T cells have less germline DNA at the TCR $\beta$  locus than WT  $\gamma\delta$  T cells. This finding led the authors to conclude that the  $\gamma\delta$  T cells developing in *Id3*<sup>-/-</sup> mice derive from cells that have an extended opportunity for TCR $\beta$  rearrangement. Our findings suggest that the reason for the increased TCR $\beta$  rearrangement may stem from differences in fetal versus adult cells rather than differences in *Id3*<sup>+/+</sup> and *Id3*<sup>-/-</sup> adult DN3 cells. Our findings are also inconsistent with a model in which Id3 plays a critical role in selection of self-ligand reactive  $\gamma\delta$  T cells; however, many of the *Id3*<sup>-/-</sup> V $\gamma$ 1.1+V $\delta$ 6.3<sup>+</sup> cells express CD4 or CD8 which is consistent with a failure to prevent some aspects of  $\alpha\beta$  T cell development [54]. More importantly, our data reveal that SAP-dependent signaling pathways are critically linked to the altered phenotype of *Id3*<sup>-/-</sup> T cells since the thymus of *Id3*<sup>-/-</sup> *Sh2d1a*<sup>-/-</sup> mice, unlike the *Id3*<sup>-/-</sup> or the *Id3*<sup>-/-</sup> *Tcrd*<sup>-/-</sup> thymus, is indistinguishable from the *Id3*<sup>+/+</sup> or *Sh2d1a*<sup>-/-</sup> thymus with respect to cellularity and phenotype.

Our hypothesis that Id3 functions downstream of TCR signals to limit SAP-dependent proliferation in  $\gamma\delta$  T cells is consistent with previous studies demonstrating that Id3 is a target of TCR triggered signaling in both  $\alpha\beta$  and  $\gamma\delta$  T cells [30,32]. The pathway from the TCR leading to Id3 involves the MAP kinases Erk1 or Erk2, which are triggered by the Tec kinases *Itk* and *Rlk* [55].



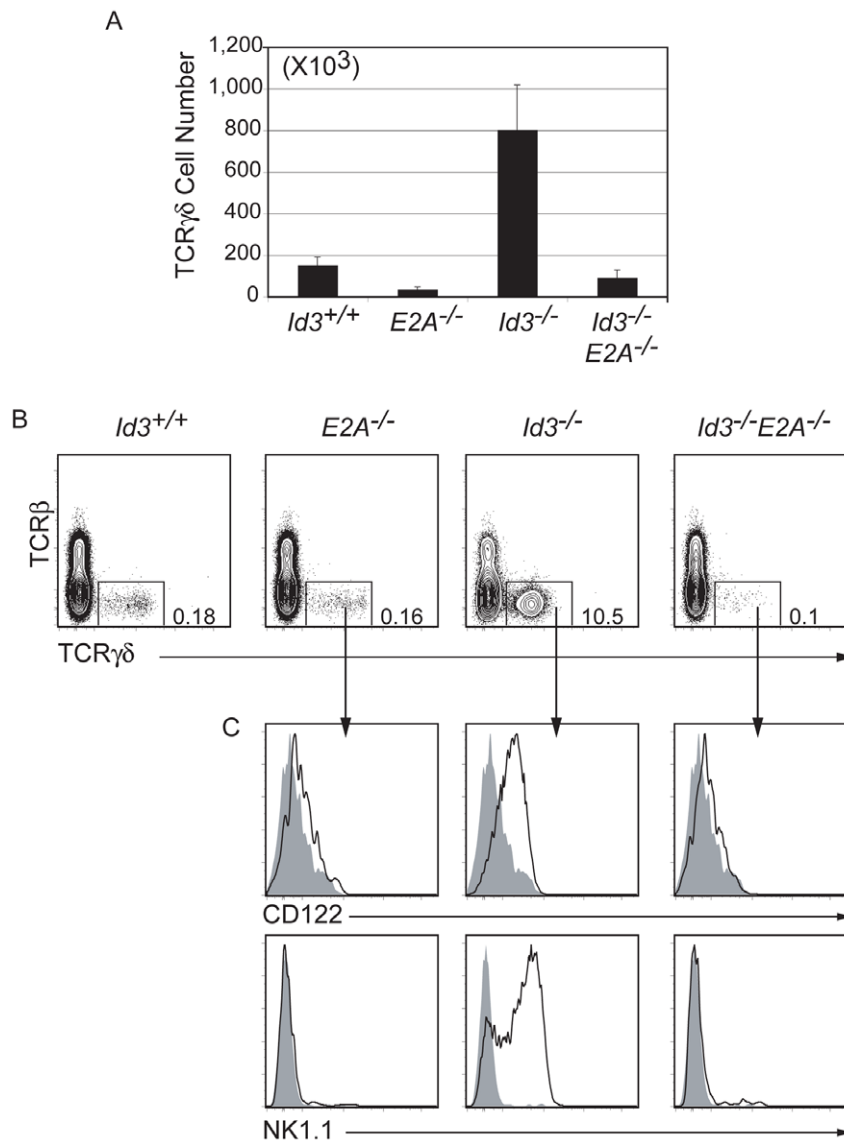

**Figure 7.  $\gamma\delta$  T cell development in *Id3*<sup>-/-</sup> mice is E2A dependent.** A) Total number of TCR $\gamma\delta$ <sup>+</sup> cells in the thymus of *Id3*<sup>+/+</sup>, *E2A*<sup>-/-</sup>, *Id3*<sup>-/-</sup> and *Id3*<sup>-/-</sup>*E2A*<sup>-/-</sup> mice. Bars represent the average  $\pm$  standard deviation.  $p < 0.001$  for *Id3*<sup>-/-</sup> compared to all other genotypes. B) Flow cytometric analysis for TCR $\beta$  and TCR $\gamma\delta$  in mice with the indicated genotype. The frequency of TCR $\gamma\delta$ <sup>+</sup> cells is shown. C) Analysis of TCR $\gamma\delta$ <sup>+</sup> cells for CD122 (upper plots) and NK1.1 (lower plots) expression. Genotypes are as indicated in C) (for the open histogram) and are shown relative to *Id3*<sup>+/+</sup> TCR $\gamma\delta$ <sup>+</sup> cells (shaded histogram), which served as a negative control. Results are representative from at least 6 mice of each genotype. doi:10.1371/journal.pone.0009303.g007

Recently, *Itk*<sup>-/-</sup> mice were reported to have an increased number of PLZF-expressing V $\gamma$ 1.1<sup>+</sup>V $\delta$ 6.3<sup>+</sup> T cells, implying that *Itk* may also limit development of “innate”  $\gamma\delta$  T cells [25,56]. Our data are consistent with the hypothesis that Id3 is an essential effector of the TCR-Itk-MAP kinase pathway that determines the consequence of signaling through the V $\gamma$ 1.1<sup>+</sup>V $\delta$ 6.3<sup>+</sup> TCR.

Id3 is an inhibitor of E protein DNA binding [57]. We, and others, found that deletion of *E2A* in *Id3*<sup>-/-</sup> mice blunted the development of activated  $\gamma\delta$  T cells indicating that elevated E2A function is critical for development of these cells [35]. It should be noted that E2A is required for normal  $\gamma\delta$  T cells development and affects the timing of rearrangement of specific V $\gamma$  receptors [21,51]. Therefore, loss of activated  $\gamma\delta$  T cells in *E2A*<sup>-/-</sup>*Id3*<sup>-/-</sup> mice, as compared to *Id3*<sup>-/-</sup> mice, could be the result of E2A functions upstream of TCR signaling and independent of Id3. However, it seems likely that *Id3* deletion leads to heightened E2A

(or E protein) activity after TCR-initiated signaling events, where E2A activity would normally be inhibited. In the case of  $\gamma\delta$  T cells, elevated activity of E2A may cooperate with SAP-dependent signals to promote an outcome from TCR-mediated signaling that is not typical, for example, leading to prolonged survival or proliferation.

Our analysis of V $\gamma$ 1.1-J $\gamma$ 4 and V $\delta$ 6-J $\delta$ 1 sequences in *Id3*<sup>-/-</sup>  $\gamma\delta$  T cells and DN3 thymocytes lead us to conclude that the majority of V $\gamma$ 1.1<sup>+</sup>V $\delta$ 6.3<sup>+</sup> cells in *Id3*<sup>-/-</sup> mice develop during fetal or neonatal life. This analysis revealed that *Id3*<sup>-/-</sup>  $\gamma\delta$  T cells have germline sequences at the V $\gamma$ 1.1-J $\gamma$ 4 and D $\delta$ 2-J $\delta$ 1 junctions, very low diversity in the V $\delta$ 6.3-D $\delta$ 2 junction and complete absence of the D $\delta$ 1 segment. However, V $\gamma$ 1.1-J $\gamma$ 4 and V $\delta$ 6-J $\delta$ 1 sequences retrieved from *Id3*<sup>-/-</sup> DN3 progenitors are characterized by diverse junctions. It is possible that the V $\gamma$ 1.1-J $\gamma$ 4 and V $\delta$ 6-J $\delta$ 1 sequences observed in *Id3*<sup>-/-</sup>  $\gamma\delta$  T cells could be generated from

adult DN3 cells and that thymic selection leads to expansion of these cells. However, two observations argue against this possibility. First, *Id3*<sup>-/-</sup>  $\gamma\delta$  T cells proliferate to a similar extent as *WT*  $\gamma\delta$  T cells in the adult thymus and second, development of V $\gamma$ 1.1<sup>+</sup>V $\delta$ 6.3<sup>+</sup> T cells is blunted in *WT* or *Id3*<sup>-/-</sup> mice reconstituted with *Id3*<sup>-/-</sup> adult bone marrow. Therefore, adult thymic progenitors do not efficiently recapitulate the  $\gamma\delta$  T cell phenotype observed in *Id3*<sup>-/-</sup> mice. The activated phenotype of *Id3*<sup>-/-</sup> V $\gamma$ 1.1<sup>+</sup>V $\delta$ 6.3<sup>+</sup> T cells is consistent with the hypothesis that this receptor recognizes a ligand in the thymus.  $\gamma\delta$  T cells that recognize the unconventional MHC molecule T10- or T22 and V $\gamma$ 3<sup>+</sup>V $\delta$ 1<sup>+</sup> DETCs, which are also hypothesized to be ligand-selected have a similar phenotype [58].

Our results reveal an important role for *Id3* in limiting the number of V $\gamma$ 1.1<sup>+</sup>V $\delta$ 6.3<sup>+</sup> T cells. Since V $\gamma$ 1.1<sup>+</sup>V $\delta$ 6.3<sup>+</sup> T cells share many features with NKT cells including rapid production of IFN $\gamma$  and IL-4, their increased numbers could significantly alter immune responses. Indeed, *Itk*<sup>-/-</sup> mice, which also have an increased number of V $\gamma$ 1.1<sup>+</sup>V $\delta$ 6.3<sup>+</sup> T cells, have elevated serum IgE that is dependent on  $\gamma\delta$  T cells [25,56]. Therefore, while *Id3* appears to be largely dispensable for development of conventional  $\gamma\delta$  T cells, it limits the number of PLZF-expressing SAP-dependent “innate”  $\gamma\delta$  T cells.

## Materials and Methods

### Ethics Statement

All animal experiments were performed in compliance with the requirements of the University of Chicago Institutional Animal Care and Use Committee

### Mice

Mice were housed at The University of Chicago Animal Resource Center. *Id3*<sup>-/-</sup> and *Tcrd*<sup>-/-</sup> mice were purchased from Jackson ImmunoResearch. *Sh2d1a*<sup>-/-</sup> mice were a kind gift from C. Terhorst. *Genotyping was as previously described* [59,60,61]. All experiments were performed on mice that were 6 to 8 weeks old unless otherwise indicated.

### Antibodies, Flow Cytometry and Cell Sorting

Cells were blocked with anti-Fc $\gamma$ R prior to staining with specific antibodies conjugated to biotin, FITC, PE, PE-Cy7 or APC, acquired in a FACS Canto using FACSDiva software and analyzed with FLOWjo. In all experiments viable cells were gated based on forward and side scatter profiles and dead cells were further excluded using Propidium iodide. Sorting was performed on a FACSARIA. The following antibodies were purchased from BD Biosciences or eBiosciences: CD4, CD8a, CD8b, TCR $\beta$ , TCR $\gamma\delta$ , NK1.1, CD122, CD44, CD24, IFN $\gamma$ , V $\gamma$ 2, V $\gamma$ 3, ckit, and CD25. Anti-V $\gamma$ 1.1 (2.11), -V $\gamma$ 5 (F2.67) and -V $\delta$ 6.3 (9D3) were described previously [45]. For analysis of V $\gamma$ 1.1<sup>+</sup>V $\delta$ 6.3<sup>+</sup> cells a minimum of 2,000 TCR $\gamma\delta$ <sup>+</sup> cells were analyzed in each experiment.

### Cytometric Bead Assay (CBA) and IFN $\gamma$ Assay

Phorbol 12-myristate 13-acetate (PMA) plus ionomycin treatment and intracellular staining for IFN $\gamma$  were described previously [44]. CBA analysis was as described in [62].

### Real-Time Quantitative (Q)PCR

RNA from TCR $\beta$ <sup>+</sup>CD4 and TCR $\beta$ <sup>+</sup>CD8 thymocytes was DNAase-treated and reverse-transcribed using Superscript III (Invitrogen). QPCR was performed with gene-specific primers in a iCycler (BioRad), using the iQ SYBR Green Supermix (BioRad).

A standard curve was included for each primer set. *Sox13* primers: qSox13(3047)for: 5'-CCCTATTTCCTCCTCCAGACTGT-3' and qSox13(3142)rev: 5'-CTGGTTAAGTTATTCATCATTATC-3'. *Hprt* primers were reported previously [63].

### Cloning and Sequencing

DNA was isolated from 50,000 TCR $\gamma\delta$ <sup>+</sup> or 30,000 Lin-*ckit*-CD25<sup>+</sup> thymocytes as previously described [51]. V $\gamma$ 1.1-J $\gamma$ 4 and V $\delta$ 6-J $\delta$ 1 rearrangements were then amplified by the following primers: V $\gamma$ 1.1 for: 5'-CCGGCAAAAAGCAAAAAGTT-3' and J $\gamma$ 4 rev: 5'-GCAAATATCTTGACCCATGA-3', V $\delta$ 6uni for: 5'-AYTCTGTAGTCTTCCAGAAATCA-3' and J $\delta$ 1 rev: 5'-TTGGTTCCACAGTCACTTGG-3'. PCR products were ligated to pGEM-T vector (Promega). DNA from single colonies was extracted and sequenced at the University of Chicago Cancer Research Center Sequencing Facility using the T7 primer. Three independent amplifications were performed from each sample in 2 independent experiments.

### Supporting Information

**Figure S1** *Id3*<sup>-/-</sup> mice have 3-fold fewer thymocytes than *Id3*<sup>+/+</sup> mice. Total number of thymocytes in *Id3*<sup>+/+</sup> and *Id3*<sup>-/-</sup> mice. Bars represent the average  $\pm$  standard deviation from at least 10 mice.  $p < 0.0005$ .

Found at: doi:10.1371/journal.pone.0009303.s001 (2.54 MB TIF)

**Figure S2** *Id3*<sup>-/-</sup> mice have an increased number of  $\gamma\delta$  T cells in the spleen that express CD4 and CD8. A) Flow cytometric analysis of *Id3*<sup>+/+</sup> and *Id3*<sup>-/-</sup> splenocytes for TCR $\beta$  and TCR $\gamma\delta$ . Total splenocytes were first gated for viable cells using propidium iodide (PI). B) Total number of TCR $\gamma\delta$ <sup>+</sup> cells in the spleen of *Id3*<sup>+/+</sup> and *Id3*<sup>-/-</sup> mice. Bars represent the average  $\pm$  standard deviation from >15 mice.  $p < 0.001$ . C) TCR $\gamma\delta$ <sup>+</sup> cells were analyzed for CD4 and CD8 expression. D) Total number of CD4<sup>+</sup>, CD8<sup>+</sup>, DN and DP splenocytes expressing TCR $\gamma\delta$  in the spleen *Id3*<sup>+/+</sup> (grey) and *Id3*<sup>-/-</sup> (black) mice. Bars represent the average  $\pm$  standard deviation from >15 mice.  $p < 0.001$  for all *Id3*<sup>+/+</sup> to *Id3*<sup>-/-</sup> comparisons. E) Flow cytometric analysis of *Id3*<sup>-/-</sup> CD8 $\alpha$ <sup>+</sup> splenocytes analyzed for expression of TCR $\beta$  (left panel) or TCR $\gamma\delta$  (right panel) and CD8 $\beta$ .

Found at: doi:10.1371/journal.pone.0009303.s002 (10.44 MB TIF)

**Figure S3** *Id3*<sup>-/-</sup>  $\gamma\delta$  splenocytes have characteristics of activated cells. Flow cytometric analysis of *Id3*<sup>+/+</sup> DN splenocytes (A) or *Id3*<sup>-/-</sup> DN, CD4 or CD8 splenocytes (B) for expression of CD122, CD44, CD24 or NK1.1. Data are representative of more than 10 independent experiments. C) Flow cytometric analysis showing intracellular IFN $\gamma$  expression in *Id3*<sup>+/+</sup> and *Id3*<sup>-/-</sup> TCR $\gamma\delta$ <sup>+</sup> splenocytes 5 hours after stimulation with PMA and ionomycin. The shaded histogram shows staining with an isotype control antibody, open histogram shows staining with anti-IFN $\gamma$  antibody. One of 3 independent experiments is shown.

Found at: doi:10.1371/journal.pone.0009303.s003 (9.53 MB TIF)

**Figure S4** *Id3*<sup>-/-</sup>  $\gamma\delta$  T cells make IFN $\gamma$  and IL-4 after *in vitro* stimulation. (A) Total thymocytes from *Id3*<sup>+/+</sup> or *Id3*<sup>-/-</sup> mice were cultured *in vitro* with (lower panels) or without (upper panels) PMA plus ionomycin for 5 hours. Intracellular staining for IFN $\gamma$  and IL-4 on TCR $\gamma\delta$ <sup>+</sup> cells is shown. The frequency of cells producing both IFN $\gamma$  and IL-4 is indicated. (B) Cytometric bead assay for IFN $\gamma$ , IL4, IL10 and IL13 produced from anti-CD19, anti-TCR $\beta$  and anti-Ter119 depleted splenocytes 72 hours after stimulation with anti-TCR $\gamma$  antibody. PMA+ionomycin stimulated thymocytes from *Id3*<sup>-/-</sup> mice are shown as a positive control.

Found at: doi:10.1371/journal.pone.0009303.s004 (10.12 MB TIF)

**Figure S5** *Id3*<sup>-/-</sup>  $\gamma\delta$  T cells do not hyper-proliferate. BrdU incorporation in TCR $\gamma\delta$ <sup>+</sup> thymocytes (upper panels) and splenocytes (lower panels) from *Id3*<sup>+/+</sup> (left panels) and *Id3*<sup>-/-</sup> (right panels) mice 16 hours after BrdU injection.

Found at: doi:10.1371/journal.pone.0009303.s005 (4.95 MB TIF)

**Figure S6** *Id3*<sup>-/-</sup> adult hematopoietic progenitors fail to reconstitute the  $\gamma\delta$  T cell phenotype in *Id3*<sup>+/+</sup> or *Id3*<sup>-/-</sup> mice. (A) Total bone marrow cells from *Id3*<sup>+/+</sup> and *Id3*<sup>-/-</sup> (Ly5.2+) mice were injected into lethally irradiated (1000 rad) *Id3*<sup>+/+</sup> and *Id3*<sup>-/-</sup> Ly5.1+ mice and thymocytes were analyzed 6 or 12 weeks post-reconstitution. Flow cytometric analysis for TCR $\beta$  and TCR $\gamma\delta$  on total thymocytes is shown. Plots are representative of 2–3 independent experiments B) TCR $\beta$  versus TCR $\gamma\delta$  profile for *Id3*<sup>-/-</sup> thymus for comparison. (C) Total numbers of  $\gamma\delta$  T cells in *Id3*<sup>+/+</sup> and *Id3*<sup>-/-</sup> mice without reconstitution (none) or after reconstitution in *Id3*<sup>+/+</sup> or *Id3*<sup>-/-</sup> hosts. The average  $\pm$  standard deviation from 3 independent experiments is shown.

Found at: doi:10.1371/journal.pone.0009303.s006 (7.75 MB TIF)

**Figure S7** Deletion of *Sh2d1a* restores thymus cellularity and reverses the activated phenotype of  $\gamma\delta$  cells in *Id3*<sup>-/-</sup> mice. (A) Total thymocytes numbers in mice of the indicated genotypes. At

least 4 mice were analyzed for each genotype.  $p < 0.01$  for *Id3*<sup>-/-</sup> *Sh2d1a*<sup>+/+</sup> compared to *Id3*<sup>-/-</sup> *Sh2d1a*<sup>-/-</sup> or *Id3*<sup>+/+</sup> *Sh2d1a*<sup>-/-</sup>. (B) CD122, CD44, CD24 and NK1.1 expression on mice of the indicated genotype (black histogram) compared to *Id3*<sup>+/+</sup>  $\gamma\delta$  cells (grey histogram). Results are representative from more than 6 mice for each genotype.

Found at: doi:10.1371/journal.pone.0009303.s007 (9.63 MB TIF)

**Figure S8** Deletion of *Tcrd* does not restore thymus cellularity in *Id3*<sup>-/-</sup> mice. (A) Total thymocytes numbers in mice of the indicated genotypes. At least 4 mice were analyzed for each genotype.  $p < 0.01$  for *Id3*<sup>+/+</sup> *Sh2d1a*<sup>-/-</sup> or *Id3*<sup>-/-</sup> *Tcrd*<sup>-/-</sup> compared to *Id3*<sup>+/+</sup> *Tcrd*<sup>-/-</sup>.

Found at: doi:10.1371/journal.pone.0009303.s008 (3.93 MB TIF)

## Acknowledgments

We thank members of the Kee lab and Adam Savage for helpful discussions.

## Author Contributions

Conceived and designed the experiments: MV MDB BLK. Performed the experiments: MV MDB. Analyzed the data: MV MDB PP BLK. Contributed reagents/materials/analysis tools: AB EJA PP. Wrote the paper: MV BLK.

## References

- Starr TK, Jameson SC, Hogquist KA (2003) Positive and negative selection of T cells. *Annu Rev Immunol* 21: 139–176.
- Taghon T, Rothenberg EV (2008) Molecular mechanisms that control mouse and human TCR-alpha beta and TCR-gammadelta T cell development. *Semin Immunopathol* 30: 383–398.
- Bhandoola A, von Boehmer H, Petrie HT, Zuniga-Pflucker JC (2007) Commitment and developmental potential of extrathymic and intrathymic T cell precursors: plenty to choose from. *Immunity* 26: 678–689.
- Rothenberg EV, Moore JE, Yui MA (2008) Launching the T-cell-lineage developmental programme. *Nat Rev Immunol* 8: 9–21.
- Capone M, Curnow J, Bouvier G, Ferrier P, Horvat B (1995) T cell development in TCR-alpha beta transgenic mice. Analysis using V(D)J recombination substrates. *J Immunol* 154: 5165–5172.
- Dudley EC, Petrie HT, Shah LM, Owen MJ, Hayday AC (1994) T cell receptor beta chain gene rearrangement and selection during thymocyte development in adult mice. *Immunity* 1: 83–93.
- von Boehmer H, Aifantis I, Azogui O, Feinberg J, Saint-Ruf C, et al. (1998) Crucial function of the pre-T-cell receptor (TCR) in TCR beta selection, TCR beta allelic exclusion and alpha beta versus gamma delta lineage commitment. *Immunol Rev* 165: 111–119.
- Kang J, Volkmann A, Raulet DH (2001) Evidence that gammadelta versus alphabeta T cell fate determination is initiated independently of T cell receptor signaling. *J Exp Med* 193: 689–698.
- Ciofani M, Knowles GC, Wiest DL, von Boehmer H, Zuniga-Pflucker JC (2006) Stage-specific and differential notch dependency at the alphabeta and gammadelta T lineage bifurcation. *Immunity* 25: 105–116.
- Haks MC, Lefebvre JM, Lauritsen JP, Carleton M, Rhodes M, et al. (2005) Attenuation of gammadeltaTCR signaling efficiently diverts thymocytes to the alphabeta lineage. *Immunity* 22: 595–606.
- Hayes SM, Li L, Love PE (2005) TCR signal strength influences alphabeta/gammadelta lineage fate. *Immunity* 22: 583–593.
- Kreslavsky T, Garbe AI, Krueger A, von Boehmer H (2008) T cell receptor-instructed alphabeta versus gammadelta lineage commitment revealed by single-cell analysis. *J Exp Med* 205: 1173–1186.
- Havran WL, Allison JP (1988) Developmentally ordered appearance of thymocytes expressing different T-cell antigen receptors. *Nature* 335: 443–445.
- Itoharu S, Nakanishi N, Kanagawa O, Kubo R, Tonegawa S (1989) Monoclonal antibodies specific to native murine T-cell receptor gamma delta: analysis of gamma delta T cells during thymic ontogeny and in peripheral lymphoid organs. *Proc Natl Acad Sci U S A* 86: 5094–5098.
- Garman RD, Ko JL, Vulpe CD, Raulet DH (1986) T-cell receptor variable region gene usage in T-cell populations. *Proc Natl Acad Sci U S A* 83: 3987–3991.
- Asarnow DM, Goodman T, LeFrancois L, Allison JP (1989) Distinct antigen receptor repertoires of two classes of murine epithelium-associated T cells. *Nature* 341: 60–62.
- Lafaille JJ, DeCloux A, Bonneville M, Takagaki Y, Tonegawa S (1989) Junctional sequences of T cell receptor gamma delta genes: implications for gamma delta T cell lineages and for a novel intermediate of V-(D)-J joining. *Cell* 59: 859–870.
- Aono A, Enomoto H, Yoshida N, Yoshizaki K, Kishimoto T, et al. (2000) Forced expression of terminal deoxynucleotidyl transferase in fetal thymus resulted in a decrease in gammadelta T cells and random dissemination of Vgamma3Vdelta1 T cells in skin of newborn but not adult mice. *Immunology* 99: 489–497.
- Benedict CL, Gilfillan S, Thai TH, Kearney JF (2000) Terminal deoxynucleotidyl transferase and repertoire development. *Immunol Rev* 175: 150–157.
- O'Brien RL, Roark CL, Jin N, Aydinug MK, French JD, et al. (2007) gammadelta T-cell receptors: functional correlations. *Immunol Rev* 215: 77–88.
- Xiong N, Raulet DH (2007) Development and selection of gammadelta T cells. *Immunol Rev* 215: 15–31.
- Azuara V, Levraud JP, Lembezat MP, Pereira P (1997) A novel subset of adult gamma delta thymocytes that secretes a distinct pattern of cytokines and expresses a very restricted T cell receptor repertoire. *Eur J Immunol* 27: 544–553.
- Grigoriadou K, Boucontet L, Pereira P (2003) Most IL-4-producing gamma delta thymocytes of adult mice originate from fetal precursors. *J Immunol* 171: 2413–2420.
- Kreslavsky T, Savage AK, Hobbs R, Gounari F, Bronson R, et al. (2009) TCR-inducible PLZF transcription factor required for innate phenotype of a subset of gammadelta T cells with restricted TCR diversity. *Proc Natl Acad Sci U S A* 106: 12453–12458.
- Felices M, Yin CC, Kosaka Y, Kang J, Berg IJ (2009) Tec kinase Itk in gammadeltaT cells is pivotal for controlling IgE production in vivo. *Proc Natl Acad Sci U S A* 106: 8308–8313.
- Agata Y, Tamaki N, Sakamoto S, Ikawa T, Masuda K, et al. (2007) Regulation of T cell receptor beta gene rearrangements and allelic exclusion by the helix-loop-helix protein, E47. *Immunity* 27: 871–884.
- Jones ME, Zhuang Y (2007) Acquisition of a functional T cell receptor during T lymphocyte development is enforced by HEB and E2A transcription factors. *Immunity* 27: 860–870.
- Engel I, Murre C (2001) The function of E- and Id proteins in lymphocyte development. *Nat Rev Immunol* 1: 193–199.
- Bain G, Quong MW, Soloff RS, Hedrick SM, Murre C (1999) Thymocyte maturation is regulated by the activity of the helix-loop-helix protein, E47. *J Exp Med* 190: 1605–1616.
- Engel I, Johns C, Bain G, Rivera RR, Murre C (2001) Early thymocyte development is regulated by modulation of E2A protein activity. *J Exp Med* 194: 733–745.
- Engel I, Murre C (2004) E2A proteins enforce a proliferation checkpoint in developing thymocytes. *Embo J* 23: 202–211.
- Bain G, Cravatt CB, Loomans C, Alberola-Ila J, Hedrick SM, et al. (2001) Regulation of the helix-loop-helix proteins, E2A and Id3, by the Ras-ERK MAPK cascade. *Nat Immunol* 2: 165–171.
- Berg IJ, Finkelstein LD, Lucas JA, Schwartzberg PL (2005) Tec family kinases in T lymphocyte development and function. *Annu Rev Immunol* 23: 549–600.

34. Lucas JA, Atherly LO, Berg LJ (2002) The absence of Itk inhibits positive selection without changing lineage commitment. *J Immunol* 168: 6142–6151.
35. Ueda-Hayakawa I, Mahlios J, Zhuang Y (2009) Id3 restricts the developmental potential of gd Lineage during thymopoiesis. *J Immunol*; in press.
36. Alonzo ES, Gottschalk RA, Das J, Egawa T, Hobbs RM, et al. (2009) Development of Promyelocytic Zinc Finger and ThPOK-Expressing Innate  $\{\gamma\}$  $\{\delta\}$  T Cells Is Controlled by Strength of TCR Signaling and Id3 3. *J Immunol*.
37. Savage AK, Constantinides MG, Han J, Picard D, Martin E, et al. (2008) The transcription factor PLZF directs the effector program of the NKT cell lineage. *Immunity* 29: 391–403.
38. Kovalovsky D, Uche OU, Eladad S, Hobbs RM, Yi W, et al. (2008) The BTB-zinc finger transcriptional regulator PLZF controls the development of invariant natural killer T cell effector functions. *Nat Immunol* 9: 1055–1064.
39. Griewank K, Borowski C, Rietdijk S, Wang N, Julien A, et al. (2007) Homotypic interactions mediated by Slamf1 and Slamf6 receptors control NKT cell lineage development. *Immunity* 27: 751–762.
40. Melichar HJ, Narayan K, Der SD, Hiraoka Y, Gardiol N, et al. (2007) Regulation of gammadelta versus alphabeta T lymphocyte differentiation by the transcription factor SOX13. *Science* 315: 230–233.
41. Meresse B, Curran SA, Ciszewski C, Orbelyan G, Setty M, et al. (2006) Reprogramming of CTLs into natural killer-like cells in celiac disease. *J Exp Med* 203: 1343–1355.
42. Stewart CA, Walzer T, Robbins SH, Malissen B, Vivier E, et al. (2007) Germ-line and rearranged Tcrd transcription distinguish bona fide NK cells and NK-like gammadelta T cells. *Eur J Immunol* 37: 1442–1452.
43. Jensen KD, Su X, Shin S, Li L, Youssef S, et al. (2008) Thymic selection determines gammadelta T cell effector fate: antigen-naïve cells make interleukin-17 and antigen-experienced cells make interferon gamma. *Immunity* 29: 90–100.
44. Atherly LO, Lucas JA, Felices M, Yin CC, Reiner SL, et al. (2006) The Tec family tyrosine kinases Itk and Rlk regulate the development of conventional CD8+ T cells. *Immunity* 25: 79–91.
45. Pereira P, Hermitte V, Lembezat MP, Boucontet L, Azuara V, et al. (2000) Developmentally regulated and lineage-specific rearrangement of T cell receptor Valpha/delta gene segments. *Eur J Immunol* 30: 1988–1997.
46. Gerber DJ, Azuara V, Levraud JP, Huang SY, Lembezat MP, et al. (1999) IL-4-producing gamma delta T cells that express a very restricted TCR repertoire are preferentially localized in liver and spleen. *J Immunol* 163: 3076–3082.
47. Shin S, El-Diwanly R, Schaffert S, Adams EJ, Garcia KC, et al. (2005) Antigen recognition determinants of gammadelta T cell receptors. *Science* 308: 252–255.
48. Calpe S, Wang N, Romero X, Berger SB, Lanyi A, et al. (2008) The SLAM and SAP gene families control innate and adaptive immune responses. *Adv Immunol* 97: 177–250.
49. Bain G, Murre C (1998) The role of E-proteins in B- and T-lymphocyte development. *Semin Immunol* 10: 143–153.
50. Rivera RR, Johns CP, Quan J, Johnson RS, Murre C (2000) Thymocyte selection is regulated by the helix-loop-helix inhibitor protein, Id3. *Immunity* 12: 17–26.
51. Bain G, Romanow WJ, Albers K, Havran WL, Murre C (1999) Positive and negative regulation of V(D)J recombination by the E2A proteins. *J Exp Med* 189: 289–300.
52. Horai R, Mueller KL, Handon RA, Cannons JL, Anderson SM, et al. (2007) Requirements for selection of conventional and innate T lymphocyte lineages. *Immunity* 27: 775–785.
53. Li W, Sofi MH, Rietdijk S, Wang N, Terhorst C, et al. (2007) The SLAM-associated protein signaling pathway is required for development of CD4+ T cells selected by homotypic thymocyte interaction. *Immunity* 27: 763–774.
54. Lauritsen JP, Wong GW, Lee SY, Lefebvre JM, Ciofani M, et al. (2009) Marked induction of the helix-loop-helix protein Id3 promotes the gammadelta T cell fate and renders their functional maturation Notch independent. *Immunity* 31: 565–575.
55. Schaeffer EM, Broussard C, Debnath J, Anderson S, McVicar DW, et al. (2000) Tec family kinases modulate thresholds for thymocyte development and selection. *J Exp Med* 192: 987–1000.
56. Qi Q, Xia M, Hu J, Hicks E, Iyer A, et al. (2009) Enhanced development of CD4+ gammadelta T cells in the absence of Itk results in elevated IgE production. *Blood* 114: 564–571.
57. Massari ME, Murre C (2000) Helix-loop-helix proteins: regulators of transcription in eucaryotic organisms. *Mol Cell Biol* 20: 429–440.
58. Xiong N, Kang C, Raulet DH (2004) Positive selection of dendritic epidermal gammadelta T cell precursors in the fetal thymus determines expression of skin-homing receptors. *Immunity* 21: 121–131.
59. Wu C, Nguyen KB, Pien GC, Wang N, Gullo C, et al. (2001) SAP controls T cell responses to virus and terminal differentiation of TH2 cells. *Nat Immunol* 2: 410–414.
60. Pan L, Sato S, Frederick JP, Sun XH, Zhuang Y (1999) Impaired immune responses and B-cell proliferation in mice lacking the Id3 gene. *Mol Cell Biol* 19: 5969–5980.
61. Bain G, Robanus Maandag EC, te Riele HP, Feeney AJ, Sheehy A, et al. (1997) Both E12 and E47 allow commitment to the B cell lineage. *Immunity* 6: 145–154.
62. Prince AL, Yin CC, Enos ME, Felices M, Berg LJ (2009) The Tec kinases Itk and Rlk regulate conventional versus innate T-cell development. *Immunol Rev* 228: 115–131.
63. Boos MD, Yokota Y, Eberl G, Kee BL (2007) Mature natural killer cell and lymphoid tissue-inducing cell development requires Id2-mediated suppression of E protein activity. *J Exp Med* 204: 1119–1130.
